# Supplementary material for: White sustainable luminescent determination of nifuroxazide using nitrogen–sulphur co-doped carbon quantum dots nanosensor in bulk and various pharmaceutical matrices
Source: Royal Society of Chemistry journal article supplement (doi:10.1039/d3ra05471c), 2023-01-01
Supplement: d3ra05471c1.pdf [file d3ra05471c1.pdf]

**White Sustainable Luminescent Determination of  
Nifuroxazide using Nitrogen-Sulphur Co-doped Carbon  
Quantum Dots Nanosensor in Bulk and Various  
Pharmaceutical Matrices**

**Supporting Information**

**Mai M. Elnaggar<sup>a</sup>, Amira F. El-Yazbi<sup>a\*</sup>, Tarek S. Belal<sup>a</sup> and Hadil M. Elbardisy<sup>b</sup>**

<sup>a</sup>Department of Pharmaceutical Analytical Chemistry, Faculty of Pharmacy, Alexandria University, Alexandria 21521, Egypt

<sup>b</sup>Pharmaceutical Analysis Department, Faculty of Pharmacy, Damanhour University, Damanhour, 22511, Egypt

\*Corresponding Author, Tel.: +20 34871317; fax: +20 34873273. E-mail address: [amira.elyazbi@alexu.edu.eg](mailto:amira.elyazbi@alexu.edu.eg)

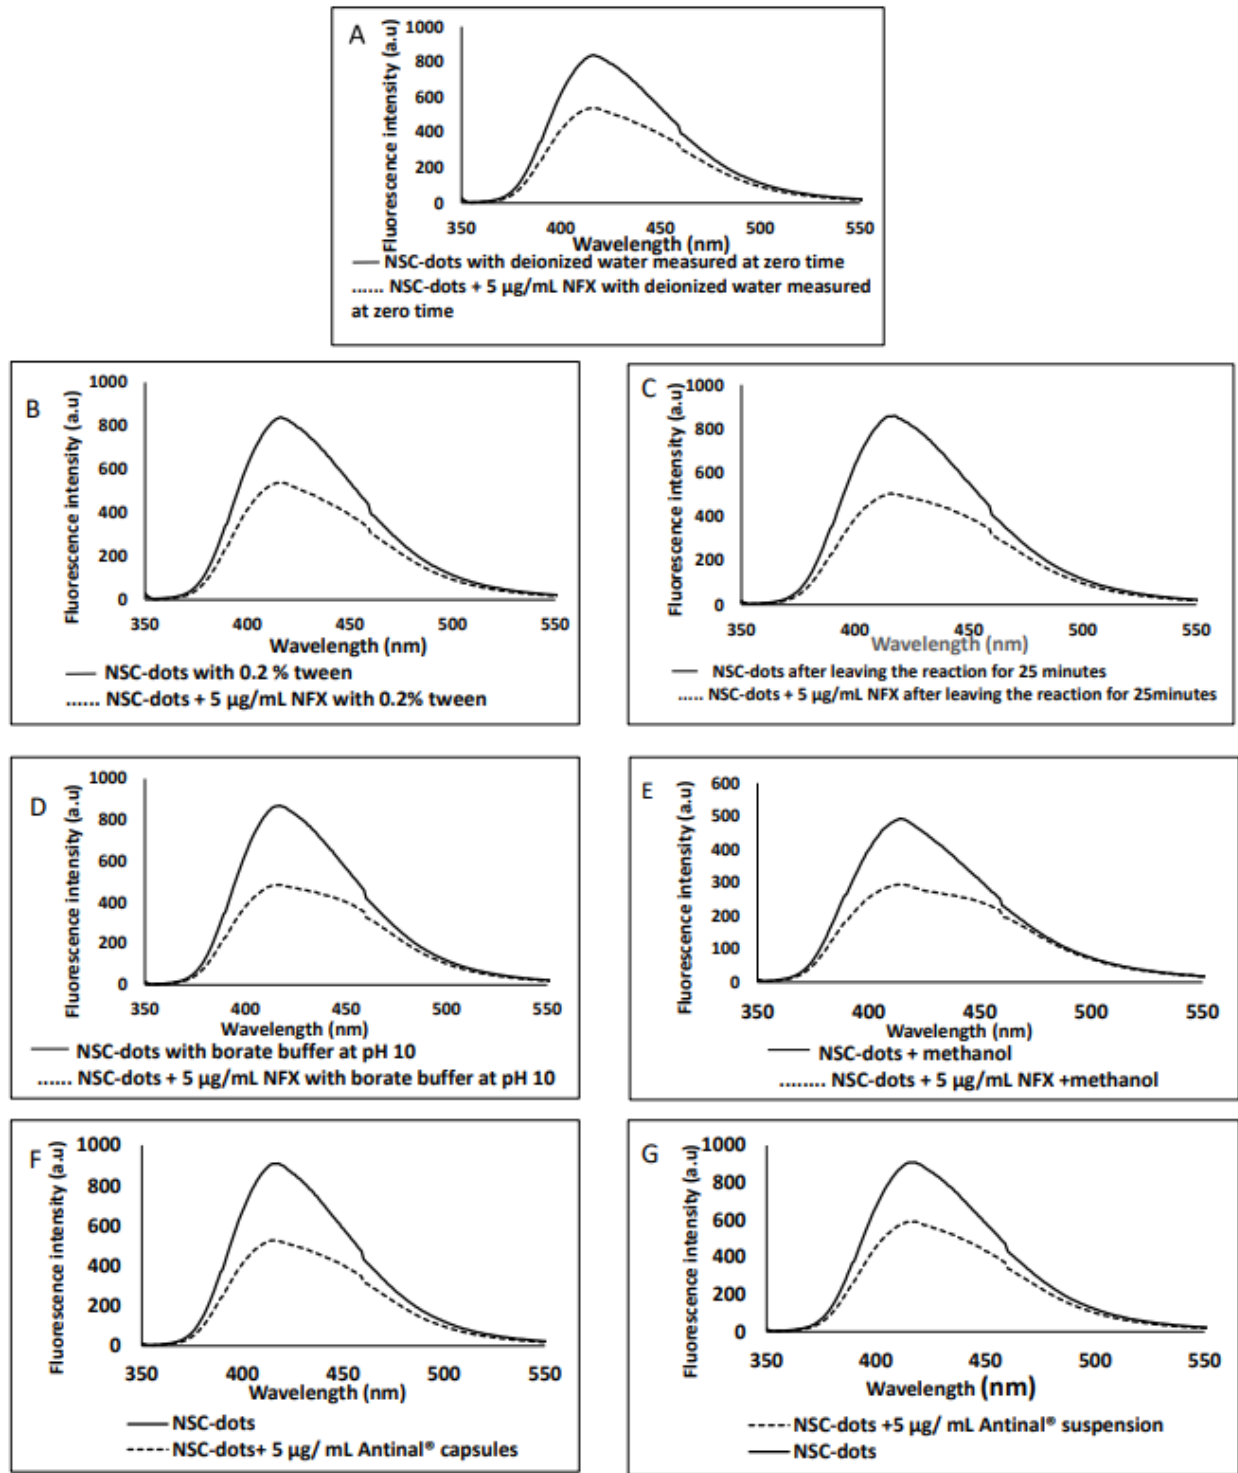

**Fig. S1a.** Fluorescence emission spectra of NSC-dots and standard 5 µg/mL NFX + NSC-dots in deionized water measured at zero time.

**Fig. S1b.** Effect of adding 0.2 % of tween on NSC dots and on NSC-dots + 5 µg/mL NFX.

**Fig. S1c.** Effect of leaving the reaction of NSC dots for 25 minutes and of NSC-dots + 5 µg/mL NFX for 25 minutes.

**Fig. S1d.** Effect of adding 2 mL of 25 mmolar borate buffer pH 10.

**Fig. S1e.** Effect of using methanol as diluting solvent for NSC dots and for NSC-dots + 5  $\mu\text{g/mL}$  NFX.

**Fig. S1f.** Fluorescence emission spectrum of NSC-dots and fluorescence emission spectrum of 5  $\mu\text{g/mL}$  Antinal<sup>®</sup> capsules+ NSC-dots.

**Fig. S1g.** Fluorescence emission spectrum of NSC-dots and fluorescence emission spectrum of 5  $\mu\text{g/mL}$  Antinal<sup>®</sup> suspension + NSC-dots.
